# Supplementary material for: Sunlight-driven degradation of Rhodamine B by peanut-shaped porous BiVO4nanostructures in the H2O2-containing system
Source: Royal Society of Chemistry journal article supplement (doi:10.1039/c1ce06264f), 2011-11-21
Supplement: c1ce06264f.pdf [file c1ce06264f.pdf]

# Electronic Supplementary Information for Sunlight-driven degradation of Rhodamine B by peanut-shaped porous $\text{BiVO}_4$ nanostructures in the $\text{H}_2\text{O}_2$ -containing system

Ming Ge,<sup>a</sup> Lu Liu,<sup>a,\*</sup> Wei Chen,<sup>a,\*</sup> Zhen Zhou<sup>b,\*</sup>

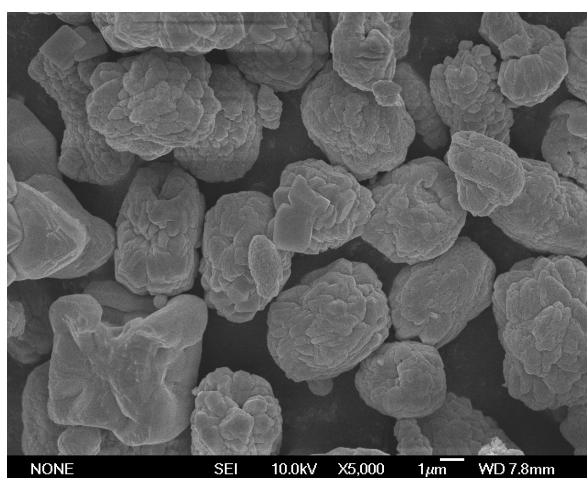

Fig. S1 SEM image of the  $\text{BiVO}_4$ -2 product.

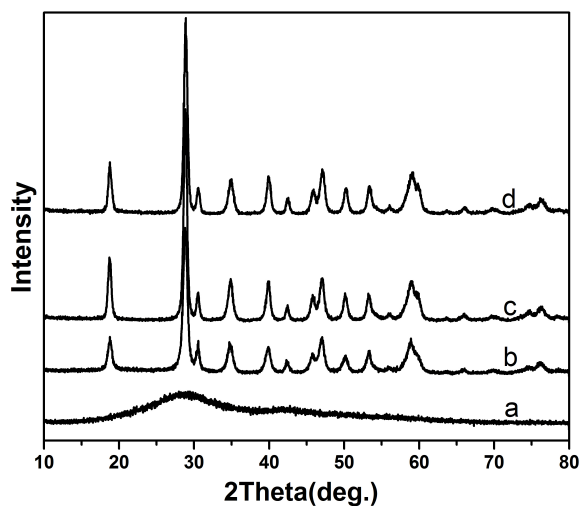

Fig. S2 XRD patterns of the products solvothermally synthesized at the different reaction time; a) 0 h; b) 0.5 h; c) 2 h; d) 4 h.

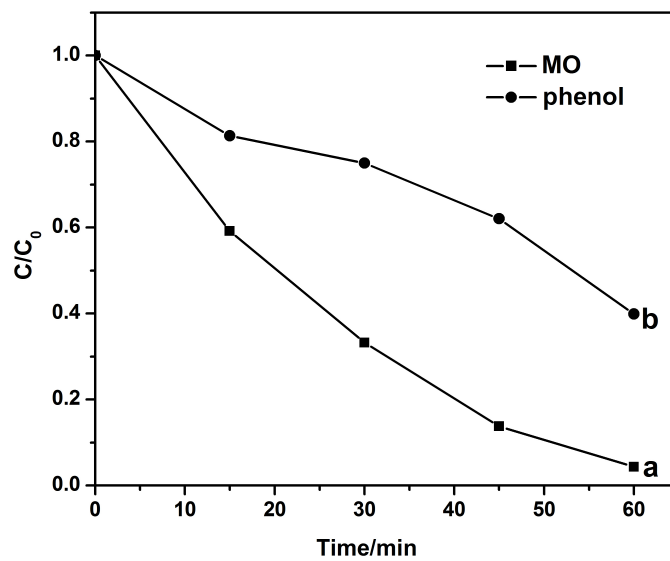

**Fig. S3** Photodegradation of MO and phenol in the BiVO<sub>4</sub>-1/H<sub>2</sub>O<sub>2</sub> system.

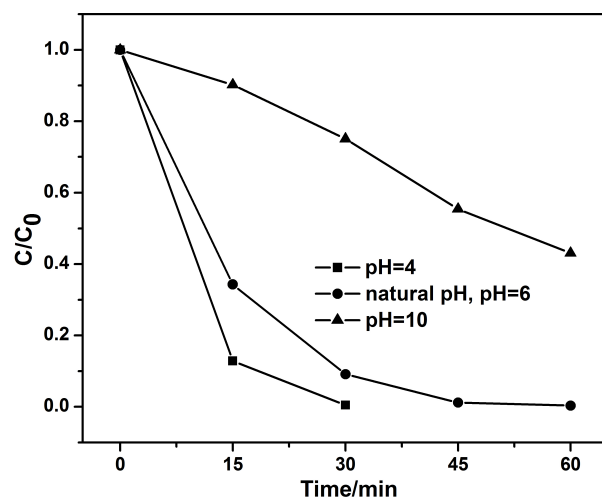

**Fig. S4** Photocatalytic degradation of RhB in the BiVO<sub>4</sub>-1/H<sub>2</sub>O<sub>2</sub> system under different solutions.

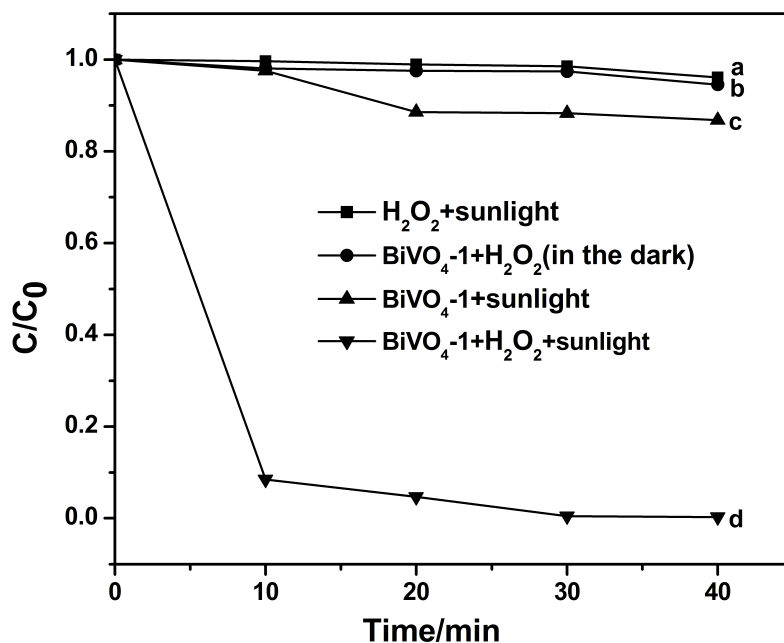

**Fig. S5** Photodegradation of RhB under different conditions.( Natural sunlight-induced photocatalytic experiments were carried out in 250-mL beakers. All photocatalytic experiments were conducted under similar conditions on sunny summer days between 1 and 4 p.m. at Nankai University).

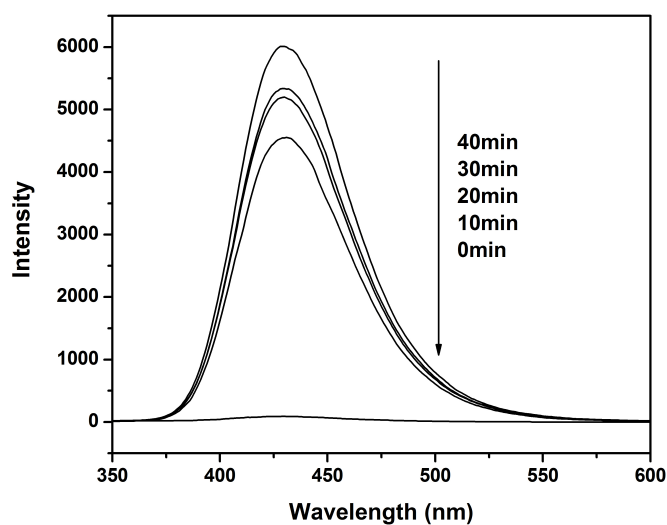

**Fig. S6**  $\text{OH}\cdot$ -trapping PL spectra of  $\text{BiVO}_4\text{-1}$  suspension in the presence of 0.1 mL  $\text{H}_2\text{O}_2$  and

3 mmol/L terephthalic acid.

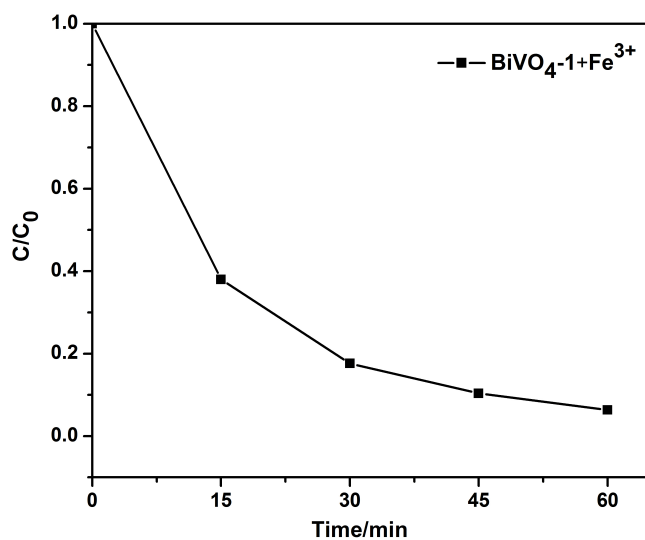

**Fig. S7** Photodegradation of RhB in the porous BiVO<sub>4</sub>-1/Fe<sup>3+</sup> system.

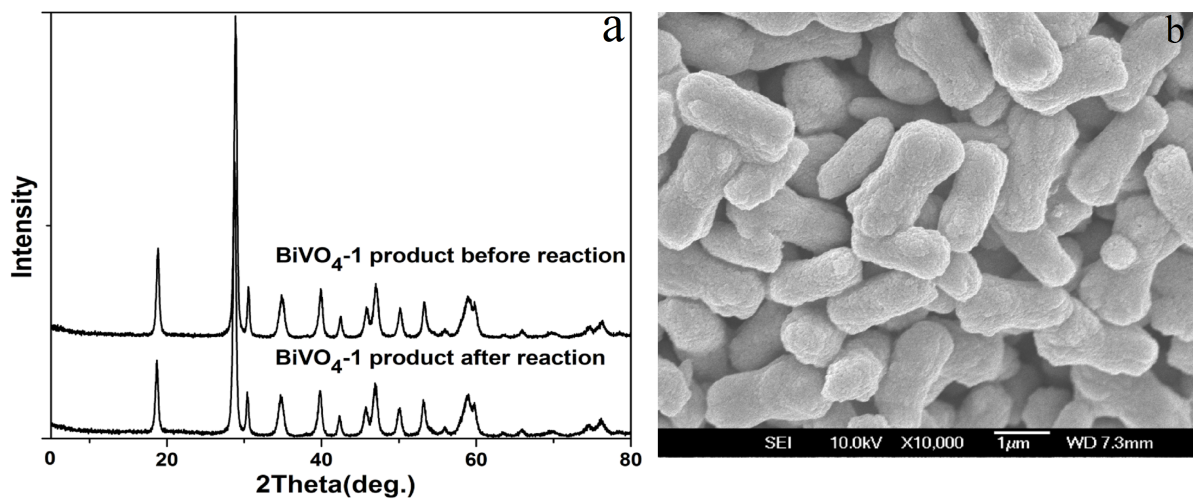

**Fig. S8** (a) XRD patterns of BiVO<sub>4</sub>-1 nanostructures before and after cycling runs; (b) SEM image of BiVO<sub>4</sub>-1 nanostructures after cycling runs.
